# Supplementary material for: Characterization of the Autophagy Marker Protein Atg8 Reveals Atypical Features of Autophagy in Plasmodium falciparum
Source: PubMed Central journal article supplement (PMC4245143; doi:10.1371/journal.pone.0113220), 2014-11-26
Supplement: pone.0113220.s001.pdf [file pone.0113220.s001.pdf]

ScAtg11 -----MADA**DE**YSTAPTQQEITP**L**QTTATIINA**I**SGECITTNVDF---F**V** 42  
PfAtg11 YTKNKSDFNNYNLNE**S**LN**D**SYKDKT**F**EELKS**Q**L**I**KQKNLNS**C**L**S**LK**L**K**S**I**H**I**K**L**N**N**L****F**L 60

ScAtg11 SLDK**F**K**Q****F**I**A**R**K****W**K**I**PPD**Q****L****L**I**L**LPYGN**L**K**P**SM**F**K**E**L**L**INRS**F**T**L**N---DFY**V****Y**DRRL 98  
PfAtg11 KKNE**F**E**K**T**I**NN**K**I**K**E**I**E**L****Q****F****L**I**I**QNV**T**HEN**K**G**I**P**I**S**K**E**L****K**E**Q**E**K**H**L**QNSHENVA**I****Y**D**T**H**E** 120

ScAtg11 FSLV**S****K**PTPTN**L**L**T**SK**D**SN**P**M**S**PN**S**ND**L**T**E**T**L**E**Y**L**I**K**N**SH**I**S**Q**Y**Q**S**D**T**I**M**I**K**P**M**P**S**P**L 158  
PfAtg11 IEN**N**D**K**K**L**Y**T**N**F**H**N**E**K**D**H**L**K**C**L**L**E**E**Y**S**K**T**L**E**I****Y**K**M**G**K**I**Q**L**E**F**E**L**K**C**C**E**K**L**N**E**E**I**E**K**N** 180

ScAtg11 EDADVDLS--RLNYH**S****V**T**S**L**L**T**T**N**L**G**W**L**S**A**L**E**I**D**V**H**Y****F****K****S**-----L**I**P**D**I**A**H**I**K 206  
PfAtg11 NN**Y**NN**K**M**K**S**Y**E**I**H**I**D**V****V****K**N**E**N**C**K**N**L**E**E**L**N**D**L**K**L**Q**L**E**K**T****K**S**E**NN**Q**N**Y**V**K**N**K**I**L**N**D**E**K**N**L**D 240

ScAtg11 R**I****F**D**G**L**T**V**C**S**Q**Y**L****K**L**Y****C****F****D****V****E**S-----L**Y**N**S**N**V****Q****F**L**N****Q**L**V**D**N**G**M**T**S** 247  
PfAtg11 **K**I**N**N**D**L**K**I**K**I**K**N**F****K**T**L**L**N**D**A**Q**N**K**E**Y**I**L**N**N**F**T**Q**K**I**F**N**I**I**T**Y**L**K**N**N**D**E**H**N****F**L**N**D**K**I**H**N**K**L**D**I 300

ScAtg11 K**W**E**K**C**F**N**D**T**L**S**K**L**T**A**E**G**D**S**L**Q**K****F**I**N**I**E**S**L**E**N**-----E**K**S**V**K**I**L**N**H**S**I**N**G**K**L**N****K**I**K**R**E**I 302  
PfAtg11 N**Q**D**Q**I**Y**V**Q**T**E**L**Y**I**D**I**I**S--S**I**R**N**L**I**N**F**K**K**T**L**E**R**N**V**E**L**E**K**V**T**H**E**M**K**E**L**R**K**E**L**I**L****K**K**N**Y**E** 359

ScAtg11 DENASFRD**I**I**T****V**N**I**D**R**L**R**Q**M**F**T**P**N**E**S**K---F**E**L**E**D**Q**M**A**E**S**F**E**V**L**V**S**E**M**R**T**R**S**R**N**V**L**D**K**E**E** 359  
PfAtg11 E**L**R**L**K**L**N**H**L**E**C**V**E**R**D**S**V**K**I**N**S**E**K**E**K**E**K**V**I**Y**E**L**K**E**K**L**D**N**D**E**K**I**I**N**D**L**K**K**N**S****Y****Q****V****Y**K**M**K**D** 419

ScAtg11 E**E**F**N**S**Q**E**F**L**K**S**M**N---V**M**L**E****K**D-----K**K**E**S**V**K**T**L**F**T**I**S****Q**A**L****Y**S**Q**I**G**E**L**I**D**L**K**S 406  
PfAtg11 **Y**E**K**R**E**N**N**L**I**N**E**I**N**K**L**K**L****F**I**E**N**K**M**T**V**E**R**G**N**E**M**N**N**K**L**E**E**M****K**Q**K**N**K**E**L**I**N**N**L**N**D**I**S**D**E**L**K**N 479

ScAtg11 L**Q**K**H**A**V**A**I**L**G**N**I**A**F**T**Q**M**E**I**L**G**I**K**R**L**L**N**E**C**N****K**D**L**E**L****Y****K****K****Y**E**V**E**F**A**Q**V**E**D**L**P**L**I**Y**G**L****Y**L**I**E 466  
PfAtg11 C**I**E**Q**V**N**S**V**S**R**N**M**A**N**V**E**K**E**K**E**N**I**I**N**E**L****Q**I**L**R**M****K**N**D**T**M**R**K**R**I**S**K**F**V**E**Q**E**K**V**L**K**F**K**L****Y**T**L**N**N**D 539

ScAtg11 K**Y**R**R**L**S****W****F****Q****I**L**S**F**I**S**N**F**N**Q**D**L**E**L**F**K**Q**N**E**L**R**T**R**N**K**W**V**K**N**F**G**S**I**A**T**V**F**C**E**D**L**L**S**S**D**F**K**R**L** 526  
PfAtg11 I**F**S**K**N**E**K**L**N**D**M**Q**K**L**N**D**V**N**E**K****Y**K**N**I**V**E**C**L**N****Y****K**T**E**H**K**E**Q**I**E**K**K**I**E**R**I**N**T**L**K**Q**N****Y****Y**L**K**E 599

ScAtg11 N**E****Y**H**S**H**T**S**P**P**N**E**D**E**E**D**E**N**E**N**S**I**A**N**R**Q**D**L**V****K****V****S****Q**A**I**D**N****Y**M**T****Q**I**K**E**T**D**V**S**E**P**I**I**D**L**L**S**K**T**L** 586  
PfAtg11 **Y**D**L**K**N**K**E**L**E****K**N**I**E**H**G**K**K**L**E**H**E**L**S**H**C**Y**E**E**N**Q****K**L**N**E**I**K**R**R**N**S**F****I**K**N****K**D**R**K**I**D**L**L**T**N**I**E**N**L 659

ScAtg11 F**E**T**K**R**F**H**I**I**Y**S**N**F**K**N---N**N**N**N**S**S**N**G**N**S**I**S**P**E**G**S**I**A**L**K**S**D**D**V**V**K**G**Y**K**T**R**I**K**K**L**E**S**L**L**H**E**F** 643  
PfAtg11 L**K**K**K**E**I**N**N**I**K**L**M**E**K**Q**N**V**I**K**N**N**E**Q**L**L**K**D**I**K**D**E**N**E**K**M**N**E**H**V**N**K**L**Q**N**E**L**I**K**R**E**L**Q**N**K**I**S**K**D**I 719

ScAtg11 Q**Y**S-----D**I**G**H****W**P**Q**G**V**L**N**--T**H**L**K**P**F**R**G**S**A**T**S****I**N**K**---K**K**F**L**G**A**S**V**L**L**E**P**A**N**I**S**E**V**N 691  
PfAtg11 E**F**C**K**K**E**K**E**D**K**I**K**N**L**E**D**D**L**L**E**K**K**K**C**I**E**N**L**K**D**E**L**I**N**I**K**K**M**E**D****K**M**H**M**T**N**E**M**D**L**L**S**N**K**V**E**E**L**N** 779

ScAtg11 -**I**D**S**V**S****Q**A**N**N**H****Q**I**Q**E**L**S**N**V**D**D**L**L**H**Q**L**Q**L**L**K**E**E**N**N**R**K**S**M**Q**I**S**E**M**G**K**K**I**S**D**L**E**V**E**K**T**A**Y**R**E 750  
PfAtg11 R**I**N**K**T**Y**E**K**N**I**V**E**L**N**N**E**L**D**V**I**K**K**L**N**D**E**E**F**L**K**E**E**E**K**K**N**I**D**M**V****Y**K**I**K**E****Y**E**I**Q**I**K**E**K**E**N**E**I**D** 839

ScAtg11 T**L**T**N**L**N**Q**E**L**A**R**L**T**N**E**E**Q**S**H**R**T**E**I**F**T**L**N**A**S**F**K**Q**L**N**D**I**I**S**Q**D**N**E**K**I**E**K**---L**T**G**D****Y**D**D**V**S** 806  
PfAtg11 S**L**K**K**N**E**Q**N**L**H**V**L**K**N**E**L**N**E**K**E**I**I**L**K**N--K**Y**D**K**E**I**N**M**I**E**Q**Y**N**K**K**I**Q**E**E**K**D**M**L**N**N**K**I**K**S**M**D 897

ScAtg11 K**S**R**E**R**L**Q**M**D**L**D**E**S**N**K**K**H**E**Q**E**V**N**-----L**L**K**A**D**I**E**R**L**G**K**Q**I**V**T**S**E**K**S**Y**A**E**T**N**S**S**S 855  
PfAtg11 Q**T**H**K**N**Q**I**E**E**M**Q**E**N**K**K**E**L**R**L**K**N**V**C**D**M**N**L**Q**S**Q**I**L**I**K**E**N**E**K**H**M**Q**E**K**V**E**Y**K**N**L**L**K**Q**K**D**Q**E**L 957

ScAtg11 M**E**K**G**E**K**F**E**T**I**P**L**A**E**D**P**G**R**E**N**Q**I**S**A****Y**T**Q**T**L**Q**D**R**I**F**D**---I**I**S**T**N**I**F**I**L**E**N**I**G**L**L**L**T**F**D**N**N 911  
PfAtg11 K**N**I**I**Q**E****Y**D**E**R**I**E**I**Q**N**K**E**M**E**D**I**V**N**D**C**E**E**K**L**K**Q**A**K**I**N**N**K**L**T**T**A**T**N**M**A**N**N**N**M**L**M**D**E**N**L**K**E**K 1017

**Figure S1.** Alignment of the yeast Atg11 (ScAtg11) and its putative *P. falciparum* homolog (PfAtg11) was performed using the Clustal W2 program. Shown are conserved residues (in red).
