# Supplementary material for: Characterization of the Autophagy Marker Protein Atg8 Reveals Atypical Features of Autophagy in Plasmodium falciparum
Source: PubMed Central journal article supplement (PMC4245143; doi:10.1371/journal.pone.0113220), 2014-11-26
Supplement: pone.0113220.s006.pdf [file pone.0113220.s006.pdf]

|        |                                                                                                                                                                                                                                                                                                                                                                                 |      |
|--------|---------------------------------------------------------------------------------------------------------------------------------------------------------------------------------------------------------------------------------------------------------------------------------------------------------------------------------------------------------------------------------|------|
| ScAtg4 | MQRWLQLWKMDLVQKVSHGVFEGSSEEPAAALMNHDIYIVLGEVYPERDEESGAEQCEQDCR                                                                                                                                                                                                                                                                                                                  | 60   |
| PfAtg4 | MSKEMKNFEDNQKKIEINSTIQEGKEEENKTLDEIKNVPVAINSNKINKKDNKYIKKKNS                                                                                                                                                                                                                                                                                                                    | 60   |
| ScAtg4 | YRGEAVSDGFLSSFLGREISSYTKEFLLDVQSRVNFYRTRFVPIARAPDGPSPILSLNLL                                                                                                                                                                                                                                                                                                                    |      |
| PfAtg4 | KKTKNNFIHIKNKNVDDLVSQNKSKYKILNYFNFKYNFSEIKRYFKILVNVSLLNLYLPL                                                                                                                                                                                                                                                                                                                    | 120  |
| ScAtg4 | VRTNPSTIEDYIANPDCFNTDI-----                                                                                                                                                                                                                                                                                                                                                     | 83   |
| PfAtg4 | NLRNINISNVYIFGLCLNLKNPDEmkiflilckskilftyrsnflirindnnyrsnml                                                                                                                                                                                                                                                                                                                      | 180  |
| PfAtg4 | vdnnvsqsniftydnttynnsnitinnnnnnnsnitinnnnnnnnssnitinnnisnlc<br>innnhtststntnssdnlpilcqeyehidqqdyliyiskkkkkkkklkkkiyykqri<br>infthdipehflkkkiyfdkcefyinfksskgndtytyqkhsqeikenyslqnnkkkk<br>skeeiyygdtctytttesnktiiylenskkcnsvdnkeiknkniskddmhyreqkkkiik<br>nkseentcdddlecfnpndrnpneemkkkkkkikinnnnnieseatikniniikt<br>knskkihlsrskkshsvlikkkknkniiknnnikeylkyvnqnitksqiyekdkkyic | 540  |
| ScAtg4 | ----GWGCMIRTGQSLGNALQILHLGRDFRVNGNESLERESK FVNWFNDTPEAPFSLHN                                                                                                                                                                                                                                                                                                                    | 199  |
| PfAtg4 | MSDNGWGC MIRVIQMLANIL IHFNISNRVYFHNVDYILYKNYINKLTTCTNKENKII                                                                                                                                                                                                                                                                                                                     | 600  |
| ScAtg4 | FVSAGTELSDKRPG-----                                                                                                                                                                                                                                                                                                                                                             | 213  |
| PfAtg4 | QIEEKT MNKDK EESiylnyknkdstkemvkehknqcesnecnlknasqnnkesdtlmi                                                                                                                                                                                                                                                                                                                    | 660  |
| PfAtg4 | hpqsniiingnnnninsnnnnnnnnnnnnnnnnnnnnsssttfnsntylvpdsfkq<br>eynkssikt dflqsdqit lndtninesqgsdiynidvenitknynssdlhccenynn<br>llnnknnnndsenseimhinnsliysilsefrdleqakysiqniyemikykkiddnqieh                                                                                                                                                                                         | 840  |
| ScAtg4 | ---EWFGPAATARSIQSLIYGFPECGIDDCI-----                                                                                                                                                                                                                                                                                                                                            | 241  |
| PfAtg4 | FVHDWLGPTSSAIIISNLINKKKVRFVKKKMKmknfrgtnihmdkniyiekeqkeltnyt                                                                                                                                                                                                                                                                                                                    | 900  |
| ScAtg4 | -----VSVSSGDIYE                                                                                                                                                                                                                                                                                                                                                                 | 251  |
| PfAtg4 | nnnkqiykllnqkeninisksddnikndkkkynkllflkekkkkkytffsVAFETGVIYN                                                                                                                                                                                                                                                                                                                    | 960  |
| ScAtg4 | NEVEKVF AENPNRILFLLGVKLGINAVNESYRESICGI--LSSTQSVGIAGGRPSSSLY                                                                                                                                                                                                                                                                                                                    | 309  |
| PfAtg4 | NKVLKFFQIKQDIFI I I IWICLKL GIDSLNVS KYKKSLLSCLLQKQFGISSGNTNTSAHY                                                                                                                                                                                                                                                                                                               | 1020 |
| ScAtg4 | FFGYQGN EFLHFDPHIPQPAVEDSFVESCHTSKFGKLQLEMDPMSMLIGILIKGEKDWOQ                                                                                                                                                                                                                                                                                                                   | 369  |
| PfAtg4 | FYSANDNGLFYLDPHIKCQNAFIDFNENISSQFFMHKVKFLPWEY-----                                                                                                                                                                                                                                                                                                                              | 1065 |
| ScAtg4 | WKLEVAESA I INV LAKRMDDFDVSCSMDDVESVSSNSMKKDASNENLGVLEGDYVDIGA                                                                                                                                                                                                                                                                                                                  | 429  |
| PfAtg4 | -----LNSSLSLIFVVQSKDDYFNLIQNLKLI DSSLFEIYHEEPQYVYKNEL                                                                                                                                                                                                                                                                                                                           |      |
| ScAtg4 | IFPHTTNTEDVDEYDCFQDIHCKKQKIVVMGNTHTVNANLTDYEVEGVLEKETVGIHSP                                                                                                                                                                                                                                                                                                                     | 489  |
| PfAtg4 | NYDTDDSGLVVL-----                                                                                                                                                                                                                                                                                                                                                               | 1124 |
| ScAtg4 | IDEKC                                                                                                                                                                                                                                                                                                                                                                           | 494  |
| PfAtg4 | -----                                                                                                                                                                                                                                                                                                                                                                           |      |

**Figure S6. Alignment of Atg4 proteins.** The yeast (ScAtg4) and *P. falciparum* (PfAtg4) sequences were aligned using the Clustal W2 program. Shown are the conserved residues (red), and catalytic cysteine and histidine residues (highlighted). The inserts in PfAtg4 are shown in lower case.
