# Supplementary material for: Characterization of the Autophagy Marker Protein Atg8 Reveals Atypical Features of Autophagy in Plasmodium falciparum
Source: PubMed Central journal article supplement (PMC4245143; doi:10.1371/journal.pone.0113220), 2014-11-26
Supplement: pone.0113220.s007.pdf [file pone.0113220.s007.pdf]

PfAtg7 MKKKFEEENKPSYILKHNNEFKIDISYFTQLHEHKINIKLQSNYVNLCSSTYVNKIKL 60  
 ScAtg7 ----MSSSERVLSYAPAFKS---FLDTSFFQELSRRLKLDVVKLDSTCQPLTVNLDLHNIK 53

PfAtg7 GFKYKLLNRYLIEFAHPFIHVRTIEINKKSLFKYENFDNEDEKNNMEPNDCCTKIENERN 120  
 ScAtg7 SADQVPL-----FLTNRSEKHNKRRTNEVP----- 79

PfAtg7 HINNINDGNKKVQKIWIYIMNRYRNNYLGVLLNFNTELEFLKCNKDDHINYTLEPLKCYIN 180  
 ScAtg7 -----LQGSIFNFNVLDEFKNLDK--QLFLHQRALECWED 112

PfAtg7 NEKNDICKDMNLYIHDNIYDDTFWEYKENCLTVLEKINKYVILSFFDLKKYICYYSIANP 240  
 ScAtg7 G-----IKDINKCVSFVIISFADLKKYRFYYWLGVP 143

PfAtg7 IIKPKDNYKLIKLNSTRYFFYIDSKYVYINTENRHINIIDIFYLSYKIDDYFNMYKMLFN 300  
 ScAtg7 CFQRP-----S 149

PfAtg7 TNIFLLKFDNIPLHTMNNQDYDEYINKLYTNIIECEEDQKSKKEFYQINSFYKLFYELK 360  
 ScAtg7 STVLHVRPEPSLKGLFSKCQKWFVNVYSKWVCILDADDEIVN----- 191

PfAtg7 LNDISQNSYHPMGNKSFNNHYNSSMLHKNYDMVILPINALSELKEDIKNSKDKILRYI 420  
 ScAtg7 -----YDKCIRKTKVLAIRDSTMENVPSALTKNFLSVLQYD 229

PfAtg7 KKDFFDLYICFIDINYIFNSLSWDFRNLLYCLTLKYKLYDFQIDVLAFRDISLLRQQYVG 480  
 ScAtg7 VPDLDIDFKLLIIRQ----- 243

PfAtg7 TFKSQEGFIWSYPKVMKRGSIINPRNYNDEDKNNNDNNYDDKNNNDNNYDDSHNNNYDD 540  
 ScAtg7 -----

PfAtg7 KNNNDNNYDDSHNNNYEDSHNNNYDDSDLHKDIDMDKDKNNSFHYNPINCLSHQDVSFC 600  
 ScAtg7 -----

PfAtg7 SVTKMCKVNYNSIKDCKNDWRDDLNEYSHDMNPIHEDIHSSSQYENMSVNNYKKN 660  
 ScAtg7 -----NEGSFALNATFASIDPQSSSNPDMKVS----- 271

PfAtg7 RNIKHNHNNIYHNHLVKYILNSSLFQVTPDKVHFYIDNGSNYVDINLNGKKDDSLNKQD 720  
 ScAtg7 -----

PfAtg7 IHILEKKKEGDTCIINSYLKSFSEDEKKNDCIDVSSNLGFSINIRKEDNHFTTRVKYKDEE 780  
 ScAtg7 -----

PfAtg7 MDVLHISEGDEENENMNNATNNINNNIKNYKTFCCDNKVYDILCGWKYYEDKKEKKS 840  
 ScAtg7 -----GWERNVQGLAPR- 284

PfAtg7 IISIIINLNDNFINKDTIQRISLELNLIKWKILKDLKFEHIKKLKLILIGLGTLCMVAR 900  
 ScAtg7 ---VVDLSSLDPKIAADQSVDLNLKLMKWRILPDLNLDIIKNTKVLLLGAGTLGCYVSR 341

PfAtg7 NCVSWGIIQHYTFVDNSRVFSNISRQYLYTLEDAEKYGNIGEYKCVAAKKNLLKICPDLN 960  
 ScAtg7 ALIAGWRKIITFVDNGTVSYSNPVRQALYNFEDCGKP-----KAELAASLKRIFPLMD 395

PfAtg7 ITAKVMDIPMPGHLNLYNENLEDTINELDNLINNHDVVFLLTDSKESRYFPCLMIAEKQY 1020  
 ScAtg7 ATGVKLSIPMIGHKLVNEEAQHKDFDRRALIKEHDIIIFLLVDSRESRWLPSLLSNIENK 455

PfAtg7 NSLQELQESVNHNNNNNNNNSSSSSSGSKFRKGDVNLCEENMITHEYIENIKCTKIM 1080  
 ScAtg7 T----- 456

PfAtg7 DKSLNNILLYEQNNIYKSLNNIHMVDRYQEIFYNNILTSVKRLCKMPPLGITVAISFDS 1140  
 ScAtg7 -----VINALGFDS 466

PfAtg7 FVVLRHYSYLYFKG---ACYFCNDMHCPSDLSYRTLDEKCTVTRCGISNISSSIATELL 1196  
 ScAtg7 YLVMRHGNRDEQSSKQLGCYFCHDVVAPTDSLTDRTLDQMCTVTRPGVAMMASSLAVELM 526

PfAtg7 LALQHPHYFFAPHIDRDQYIYNYDNMNMQKNSDISNIFTSCLGATPHIMNFNLANFTI 1256  
 ScAtg7 TSLLQT-----KYSGSETTVLGDIPHQIRGFLHNFSI 558

PfAtg7 KKIFCEPFKCMCCSERVILKYQEDKMDFIRNVIRDSSILERITNMDQLKVEEN---DV 1312  
 ScAtg7 LKLETPAYEHCPACSPKVI EAF TDLGWEFVKKALEHPLYLEEISGLSVIKQEVERLGNDV 618

PfAtg7 IILE----- 1316  
 ScAtg7 FEWEDESDEIA 630

**Figure S7. Alignment of Atg7 proteins.** The sequences of yeast (ScAtg7) and *P. falciparum* (PfAtg7) were aligned using the Clustal W2 program. Conserved residues are shown in red, the ATP-binding pockets are underlined, and the catalytic cysteine residues are highlighted with black background.
