# Supplementary material for: Characterization of the Autophagy Marker Protein Atg8 Reveals Atypical Features of Autophagy in Plasmodium falciparum
Source: PubMed Central journal article supplement (PMC4245143; doi:10.1371/journal.pone.0113220), 2014-11-26
Supplement: pone.0113220.s008.pdf [file pone.0113220.s008.pdf]

```

PfAtg3      MSDQINVKHKIGDTCRKLYSYFKTVNNTSTFIQNGTLTPSEFVDSGDFLVYKFKTWEWQE 60
ScAtg3      -----MIRSTLSSWREYLTPIITHKSTFLTTGQITPEEFVQAGDYLCHEMPTWKWNE 51

PfAtg3      ADKDR-VVPYLPENKQFLITKNVPCQRIKDLNNIVHDLKIVDNDWLLPSYEEDNNPTDI 119
ScAtg3      ESSDISYRDFLPKNKQFLIIRKVPCKRAEQC-----VEVEGPDVIMKGFAEDGDEDDV 105

PfAtg3      YEYLPNSEYTINDKNVQNVQNIYNYEEEEEDDNCDEAIDINNFYMENNLKEHDPASINS 179
ScAtg3      LEYIGSETEHVQSTPAGGTK-----DSSIDDIDELIQDMEIKEED-ENDDT 150

PfAtg3      TSCYSKNMLHDNLMKIRTYDVSITYDKYQTPRIWLFGYNENGDPLKSEEIFEDILSDYS 239
ScAtg3      EEFNAKGLAKDMAQERYYDLYIAYSTSYRVPKMYIVGFNSNGSPLSPEQMFEDISADYR 210

PfAtg3      YKTVTYDPHPCTG--VMTASIHPCKHA-----EAILNVVNNW 274
ScAtg3      TKTATIEKLPFYKNSVLSVSIHPCKHANVMKILLDKVRVVRQRRRRELQEEQELDGVGDW 270

PfAtg3      ISEEKEP----RHDLYLLFLKFISGVIPTIEYDFTTDIEIPRDSNAGL 319
ScAtg3      EDLQDDIDDSLRVDQYLIVFLKFITSVTPSIQHDYTMEGW----- 310

```

**Figure S8. Sequence alignment of Atg3 proteins.** The sequences of yeast (ScAtg3) and *P. falciparum* (PfAtg3) were aligned using the Clustal W2 program. Conserved residues are shown in red, the predicted catalytic cysteine residues are highlighted, and the Atg8 family interacting motifs (AIM) are underlined.
