# Supplementary material for: Characterization of the Autophagy Marker Protein Atg8 Reveals Atypical Features of Autophagy in Plasmodium falciparum
Source: PubMed Central journal article supplement (PMC4245143; doi:10.1371/journal.pone.0113220), 2014-11-26
Supplement: pone.0113220.s009.pdf [file pone.0113220.s009.pdf]

```

ScAtg12      MSRIESENETESEDESSIISTNNGTAMERSRNNQELRSPHTVQNRLELFSRRLSQLGLA 60
PfAtg12      -----MTENYIQYIP----- 10

ScAtg12      SDISVDQQVEDSSSGTYEQEETIKTNAQTSKQKSHKDEKNIQKIQIKFQPIGSIGQLKPS 120
PfAtg12      -----VFEEKPDMREILINRRN-----QKIKIVFKCISGTTILKKN 46

ScAtg12      VCKISMSQSFAMVILFLKRRL-KMDHVYCYINNSFAPSPQQNIGELWMQFKTNDELIVSY 179
PfAtg12      KVLINGNETFSLLIFLKRIFNKNDNIYLYINNNIKPNLDDYIYDLYDLYQISGSLNISY 106

ScAtg12      CASVAFG 186
PfAtg12      SFTPAY- 112

```

**Figure S9. Sequence alignment of Atg12 proteins.** The yeast (ScAtg12) and *P. falciparum* (PfAtg12) sequences were aligned using the Clustal W2 program. Conserved residues are shown in red. The C-terminus Gly residue of ScAtg12 (absent in PfAtg8), which is conjugated to Atg5 protein, is highlighted.
