# Supplementary material for: Characterization of the Autophagy Marker Protein Atg8 Reveals Atypical Features of Autophagy in Plasmodium falciparum
Source: PubMed Central journal article supplement (PMC4245143; doi:10.1371/journal.pone.0113220), 2014-11-26
Supplement: pone.0113220.s010.pdf [file pone.0113220.s010.pdf]

```

PfAtg5      MEIGYMEVPNIKDINSNIEKSGVLVLCVSLNQKESESLISPSYYYIYVHRMYLNSNIIPKC 60
hAtg5      -----MTDDKDVLRDVWFGRIPTCFITYQDEITEREAEP-YLLLLRVSYLTLVTDKV 52
ScAtg5      -----MNDIKQLLWNGELN-VLVSIDPSFLMKGSPREI AVLIRVPRETYLVNYMPLI 52

PfAtg5      LEFFKSFILPFYGNKFGVYFECIKKEQKSSNNNNNNNNNITYTSTNNYEEKIVLDWRLP 120
hAtg5      KKHFQKVMR-----QEDISEIWFEEYEGTP-----LKWHP 82
ScAtg5      WNKIKSFLS-----FDPLTDSEKYFWFEHNKTP-----IPWNY 86

PfAtg5      IGVLFDIYCDLDSQKEYIKTYEKFNDTNINMNNKKNITICSNNELFLNHINIVKLGKTD 180
hAtg5      IGLLFDLLASS----- 94
ScAtg5      VGVLFDCLAGKS----- 98

PfAtg5      KNYDKKSNERQNQKNIYDANRNI STNTNNSNVNHQQNCDRTDDDTLHKGDDILHKGDDI 240
hAtg5      -----
ScAtg5      -----

PfAtg5      LHKGDDILHKGDDILHKGDDILYKNDILHKGDDILHKGDDILHTDAFINEKETKEGTDK 300
hAtg5      -----
ScAtg5      -----

PfAtg5      KKQINRNINKNEERERGKEVKNIIVENYEEENYMKEKKIIVENGKGSTKNDVEENKKDINT 360
hAtg5      -----
ScAtg5      -----

PfAtg5      HYDDIKLNNVDIYDDIKLNNVDIYDDTADFQYIQFIQNEKINNEWYNKQFVNISKNKIPW 420
hAtg5      -----ALPW 98
ScAtg5      -----A 99

PfAtg5      MLIVHFKEEYPLSIINKKYDEKNTHFKGDINILPYNNIPLYKGFNNFEYIINQLKK 480
hAtg5      NITVHFKS-----FPEK-----DLLHCPK-----DAIEAHFMSCMKE 131
ScAtg5      TFTTSFENQKVDLTFLR IHLVMGDSLPTIIP IASSK-----TQAEKFWFHQWK 150

PfAtg5      ANCILNKNRRALEILPQRIQKDILYSLKHFHIEKICSLYREYIDYNMLNFINYFNNSYIK 540
hAtg5      ADALKHKS-QVINEMQKDKHQLWMGLQDRFDQFWAINRKLMEY----- 175
ScAtg5      VCFILNGSSKAIMSLSVNEARKFWGSVITRNFDQFIEISNKISS----- 195

PfAtg5      KVQQVCDLNRHKDNSIQINGKSSGKQNEENLCLLKMDDLHEEESPVKITHCKDILMNDNEN 600
hAtg5      -----PAEENGFR----- 183
ScAtg5      -----RPRHIPLII----- 204

PfAtg5      YDNENNNNENNEHNCHRNSYDVHLNENFINDQSQKNHISNIRTSYNNDHVSDSLQTDIQ 660
hAtg5      -----
ScAtg5      -----

PfAtg5      NDFSSIIILENTKEQGDHINFKNLHNNKYPNVYDILKDEKVLKDCPIILHIYPPYNI 720
hAtg5      -----YIPFR-----IY-----QT 192
ScAtg5      -----QT 206

PfAtg5      LTKYPFLKLIHSNNNNNNNNNDKNNNNSNKYDGCKKYIQNVHLNTLGDFLHEQLPSFV 780
hAtg5      TTERPFIQKLFQVAADG-----QLHTLGDLKKEVCP--- 224
ScAtg5      SRTSGTFRISQPTISMTG-----VNPTLKDIEG--- 234

PfAtg5      RKIINKDEKNETSHILNKYDKKYLNSETIYYFIEDDYLIFSPYMFIIVNGIQIPLNTP 840
hAtg5      -SAIDPEDGEKKNQ-----VMIHGIEPMLLETPL 251
ScAtg5      -DILDVKEGINGND-----VMVICQIEIPWHMLL 263

PfAtg5      YWLAANFSQFDHFLHITIRIPPY----- 863
hAtg5      QWLSEHLSYPDNFLHISIIPQPTD----- 275
ScAtg5      YDLYSKLRSFDGFLYITLVPIKGGDKASSEL 294

```

**Figure S10. Sequence alignment of Atg5 proteins.** The sequences of yeast (ScAtg5), human (hAtg5), and *P. falciparum* (PfAtg5) were aligned using the Clustal W2 program. Conserved residues are shown in red. The K<sup>130</sup> of hAtg5 that is conjugated to the extreme C-terminus G of Atg12 is highlighted, and this residue is positionally conserved in all three proteins.
