# Supplementary material for: Characterization of the Autophagy Marker Protein Atg8 Reveals Atypical Features of Autophagy in Plasmodium falciparum
Source: PubMed Central journal article supplement (PMC4245143; doi:10.1371/journal.pone.0113220), 2014-11-26
Supplement: pone.0113220.s011.pdf [file pone.0113220.s011.pdf]

```

ScAtg23 -----
PfAtg23 MTKSICELQNKNSISTELLQEIKKMNENELKRKNDEYEKLNANYREIYGSYILAKTNLDDT 60

ScAtg23 -----MELNQVLEKKEQILQYLG-----TL 20
PfAtg23 TNNYEGEILKLETMLKEKEHEFYMDLRINFQELLEEKCKLENDMDNYEKAIYEINENLISL 120

ScAtg23 -VGLHEKALSDVNSA-----SQVTSIRKDTITICLN---DLCRIN----- 55
PfAtg23 KEAHHKEELKEVHEENTNLYSTIDKFKEEVEYMKENYKQLEKMNQDKINTIENLEKEMMDM 180

ScAtg23 -----DLLVSHDGLLKRFIGSLLRDKQELLELNE-----REQLLWKE 92
PfAtg23 KEEKKMVGKELDLVQSQQRMIQMEIKNLNKEKEQLKEKEETLNEKEKVKQCKEVLKIEE 240

ScAtg23 RKSWHIKQETDAAPADYVIDKDAITISS---HHRTSLNKYIESVGAENTILSNTDD--- 146
PfAtg23 KQIDTNKQVLDKEKEQIEKNKEELKLMQQNLNKEKEQIEKNKQELDKKQIYENDKKNIM 300

ScAtg23 -----SDAMIEEVQNAESSADQMIRNYKLLQLSHKQAKSEIRLETLLRDFK---- 193
PfAtg23 LKNEDLKKLLDEYKEEIMNKEGHKQIEEKILLEDEKKNFQNKIDILDNKMQEFKNEIT 360

ScAtg23 ---KDNKFIEEELKRQSGRIRSEMGNIDFHLSKIEESKHQLMKRIGFESPLTQEKSLSEK 250
PfAtg23 NEKLNLYQLKDDIDNKQNEVIKRSIIEILYNKLEKENDITLQENENLSLRNCQKELNK 420

ScAtg23 IFNLR---LSSADEDYNERQTINMKNFVHMKD----- 279
PfAtg23 ILDNKNEMINIEKLDYEKLAKLLIKKKIRQRDDLHFDGHPQSSILKILWFGYVDICKCI 480

ScAtg23 -----LIELKIEDLQEQLMRNKNESTVLTQR----- 306
PfAtg23 LKNRDGYLYKGNKNHRFICAYDTDLFLDINVENTKKGLLSFKNETRGIFQLNDEEAKKLV 540

ScAtg23 -----ELWLDCKKVGDLSEK 322
PfAtg23 YVGFNKFKGFNFCISSNKNLEIVKGNKCTYIFEEMYVTKKGTLVLIKEKESGKYFSG 600

ScAtg23 LITKLRSSNSK-IPPNEMSEMINSTIQYLN----- 353
PfAtg23 LNKNLYLEKKRQVVDKLDYNNVVKLINYIANEKEENCNMIIKTSDQKLIENEKNTCLV 660

ScAtg23 -----LLDSSEKLTTLISNERDVLSKACEELH 382
PfAtg23 QKKKNSDNSYNNEEKTNLVTKRSKTPIRKENSLSHSKYDKTKTKITNQLKKYDSKEKQNK 720

ScAtg23 SESTTAQDGSSALPSKPID----- 401
PfAtg23 EKSTSEKQTGKKLASEKNNEEKLTVNGKINEDKLNNEKNEDKLNNNRELSDENLHXYKIA 780

ScAtg23 -----IHKSHKGSNASSNLKQPSTPSFLVA 426
PfAtg23 KEMLLLSDSNSSTCDDENIYHLKNKYNHTEQNEFIHNNVINKSIATNYIENINTSLFKY 840

ScAtg23 SKSPPKIGISESVNANKND AISKKVE----- 453
PfAtg23 SKCSENYNNTNIVLTTNKEEAILFEIFNYEQIVEHDAIKLASECVFNFLNKNKSNLHDL 900

ScAtg23 -----
PfAtg23 SNIGSEGNISIFSGIDDDWCILPAYL 926

```

**Figure S11.** Alignment of the yeast Atg23 (ScAtg23) and its putative *P. falciparum* homolog (PfAtg23) was performed using the Clustal W2 program. Conserved amino acid residues are shown in red, and the putative Atg8 family interacting motif (AIM) in PfAtg23 is underlined.
