# Supplementary material for: Characterization of the Autophagy Marker Protein Atg8 Reveals Atypical Features of Autophagy in Plasmodium falciparum
Source: PubMed Central journal article supplement (PMC4245143; doi:10.1371/journal.pone.0113220), 2014-11-26
Supplement: pone.0113220.s014.pdf [file pone.0113220.s014.pdf]

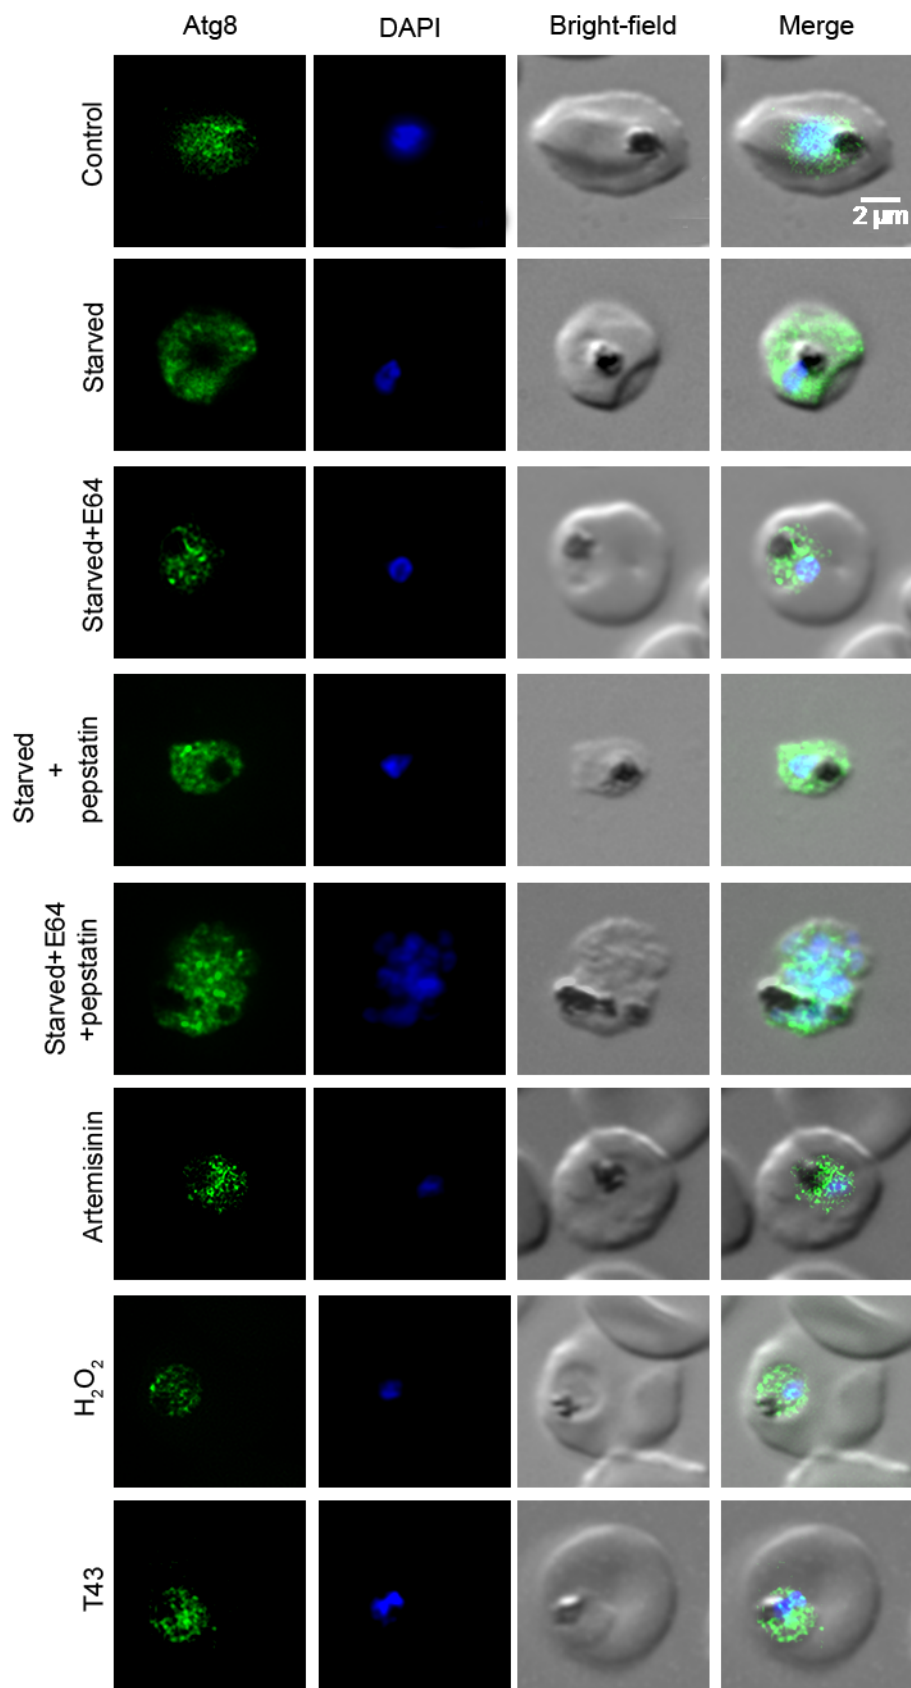

Figure S14

**Figure S14. Effects of stresses on autophagy.** Early/mid trophozoite stage parasites were exposed to a variety of stresses by culturing in complete medium (Control) or in HBSS containing DMSO (Starved) or the indicated inhibitors (22  $\mu$ M E64 (Starved + E64), 220  $\mu$ M pepstatin (Starved + pepstatin), or both (Starved + E64 + Pep) at 37°C for 8 hours. For oxidative stress, parasites were grown in complete medium containing the indicated oxidative stress-causing agents (90 nM artemisinin (Artemisinin), 100  $\mu$ M H<sub>2</sub>O<sub>2</sub> (H<sub>2</sub>O<sub>2</sub>)) at 37°C for 8 hours. For heat shock (T43), parasites were cultured in complete medium at 43°C for 8 hours. After 8 hours of the indicated treatments, parasites were evaluated for localization of Atg8 by IFA using anti-Atg8 antibodies as described in the Materials and Methods section. The images of indicated treated parasites show the presence of Atg8 specific signal (Atg8), nucleic acid staining (DAPI), the parasite and the erythrocyte boundaries (Bright field), and the merged of all three images (Merge). The Atg8 signal is present throughout the parasite regardless of the treatment, and the signal patterns in control and treated parasites are similar.
