# Supplementary material for: Characterization of the Autophagy Marker Protein Atg8 Reveals Atypical Features of Autophagy in Plasmodium falciparum
Source: PubMed Central journal article supplement (PMC4245143; doi:10.1371/journal.pone.0113220), 2014-11-26
Supplement: pone.0113220.s015.pdf [file pone.0113220.s015.pdf]

**Table S1. Percentage sequence identity of *P. falciparum* Atg proteins with other *Plasmodium* homologs.** Amino acid sequences of putative *P. falciparum* Atg proteins were aligned using the Jalview program. Shown are the sequence identities of *P. falciparum* Atg proteins with homologs in other *Plasmodium* species. The gene ID is in the bracket.

| <i>P. falciparum</i>       | <i>P. vivax</i>      | <i>P. knowlesi</i>   | <i>P. berghei</i>       | <i>P. yoelii</i>       | <i>P. chabaudi</i>     |
|----------------------------|----------------------|----------------------|-------------------------|------------------------|------------------------|
| Atg1<br>(PF3D7_1450000)    | 94.4<br>(PVX_117985) | 94.2<br>(PKH_125630) | 92.8<br>(PBANKA_131370) | 92.8<br>(PYYM_1314500) | 92.8<br>(PCHAS_131700) |
| Atg3<br>(PF3D7_0905700.1)  | 67.9<br>(PVX_098725) | 67.9<br>(PKH_070290) | 67.8<br>(PBANKA_041570) | 66.3<br>(PYYM_0418500) | 68.1<br>(PCHAS_041660) |
| Atg4<br>(PF3D7_1417300)    | 35.9<br>(PVX_085585) | 36.5<br>(PKH_133050) | 39.6<br>(PBANKA_102540) | 40.2<br>(PYYM_1027500) | 40.2<br>(PCHAS_102620) |
| Atg5<br>(PF3D7_1430400)    | 29.5<br>(PVX_085020) | 30.1<br>(PKH_131990) | 34.0<br>(PBANKA_101430) | 35.0<br>(PYYM_1015800) | 35.1<br>(PCHAS_101510) |
| Atg7<br>(PF3D7_1126100)    | 32.6<br>(PVX_091922) | 35.3<br>(PKH_092370) | 44.0<br>(PBANKA_092220) | 42.7<br>(PYYM_0923600) | 41.7<br>(PCHAS_092220) |
| Atg8<br>(PF3D7_1019900)    | 88.7<br>(PVX_001860) | 88.7<br>(PKH_060390) | 87.9<br>(PB000658.01.0) | 87.9<br>(PYYM_0504500) | 89.5<br>(PCAS_050420)  |
| Atg11<br>(PF3D7_0216700.1) | 30.1<br>(PVX_002705) | 32.5<br>(PKH_040340) | 36.4<br>(PBANKA_031340) | 36.3<br>(PYYM_0314200) | 34.4<br>(PCHAS_031550) |
| Atg12<br>(PF3D7_1470000)   | 68.8<br>(PVX_116967) | 69.6<br>(PKH_123525) | 68.8<br>(PBANKA_133320) | 68.8<br>(PYYM_1334900) | 68.8<br>(PCHAS_133780) |
| Atg15<br>(PF3D7_1427100)   | 37.0<br>(PVX_085180) | 38.1<br>(PKH_132330) | 42.1<br>(PBANKA_101750) | 42.8<br>(PYYM_1019000) | 43.3<br>(PCHAS_101830) |
| Atg17<br>(PF3D7_1120000)   | 42.0<br>(PVX_091635) | 46.7<br>(PKH_091740) | 45.6<br>(PBANKA_092820) | 50.9<br>(PYYM_0929600) | 50.0<br>(PCHAS_091610) |
| Atg18<br>(PF3D7_1012900)   | 97.9<br>(PVX_094865) | 97.1<br>(PKH_081240) | 91.6<br>(PBANKA_121130) | 91.6<br>(PYYM_1213900) | 91.1<br>(PCHAS_121200) |
| Atg22<br>(PF3D7_0629500)   | 60.5<br>(PVX_114575) | 59.3<br>(PKH_111940) | 52.2<br>(PBANKA_112830) | 53.9<br>(PYYM_1130600) | 51.9<br>(PCHAS_112780) |
| Atg23<br>(PF3D7_1126700)   | 45.0<br>(PVX_091950) | 45.2<br>(PKH_092430) | 45.4<br>(PBANKA_092170) | 46.5<br>(PYYM_0923100) | 46.7<br>(PCHAS_092270) |
| VPS34<br>(PF3D7_0515300)   | 36.4<br>(PVX_080480) | 36.0<br>(PKH_101740) | 40.6<br>(PBANKA_111490) | 40.2<br>(PYYM_1117000) | 39.6<br>(PCHAS_111450) |
| VPS15<br>(PF3D7_0823000)   | 39.3<br>(PVX_089215) | 41.3<br>(PKH_050800) | 46.0<br>(PBANKA_070760) | 44.2<br>(PYYM_0707800) | 44.2<br>(PCHAS_071690) |
